# Supplementary material for: Suppressing Nodal Signaling Activity Predisposes Ectodermal Differentiation of Epiblast Stem Cells
Source: PubMed Central journal article supplement — Stem Cell Reports. 2018 Jun 28;11(1):43–57. doi: 10.1016/j.stemcr.2018.05.019 (PMC6067151; doi:10.1016/j.stemcr.2018.05.019), 2018-06-28
Supplement: mmc1.pdf [file mmc1.pdf]

**Stem Cell Reports, Volume 11**

**Supplemental Information**

**Suppressing Nodal Signaling Activity Predisposes Ectodermal Differentiation of Epiblast Stem Cells**

**Chang Liu, Ran Wang, Zhisong He, Pierre Osteil, Emilie Wilkie, Xianfa Yang, Jun Chen, Guizhong Cui, Wenke Guo, Yingying Chen, Guangdun Peng, Patrick P.L. Tam, and Naihe Jing**

**A**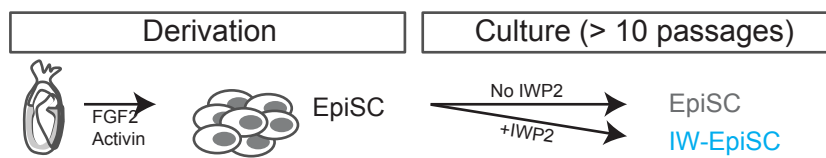**B**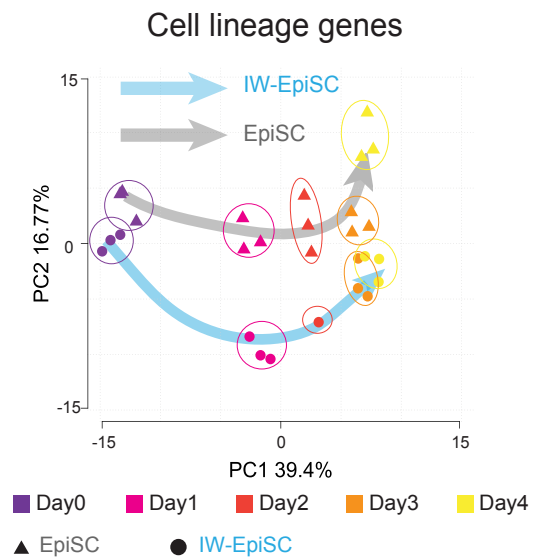**C**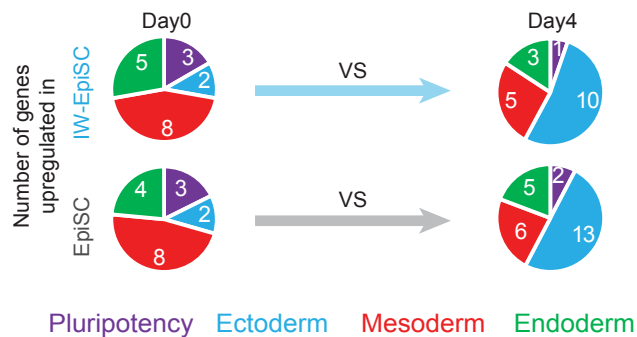**D**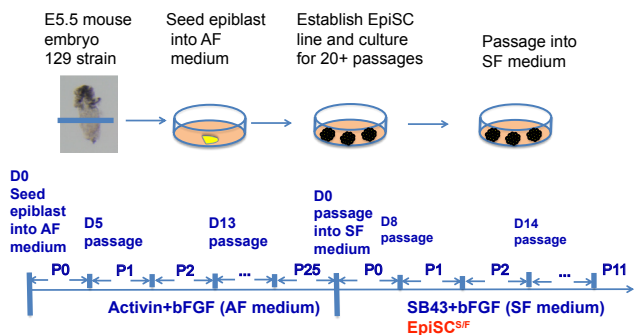**E**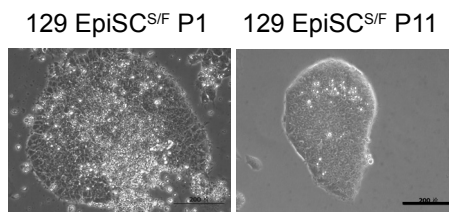**F**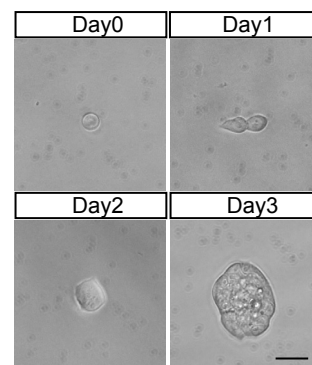**Figure S1**

**A**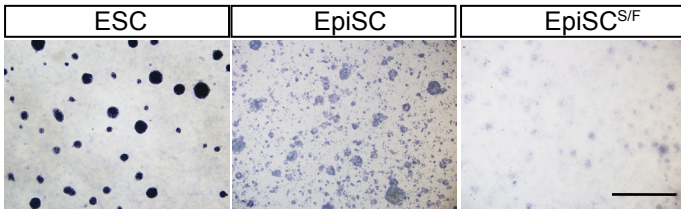**B**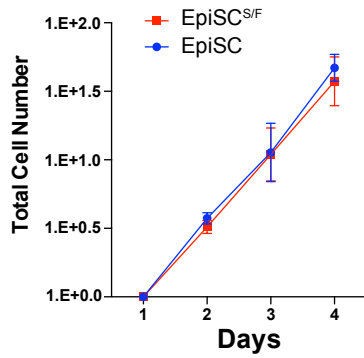**D**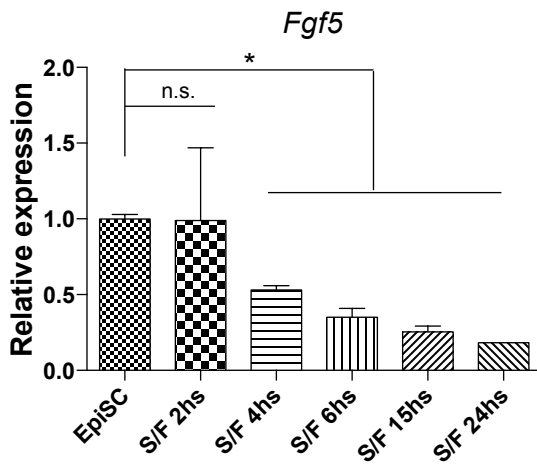**F**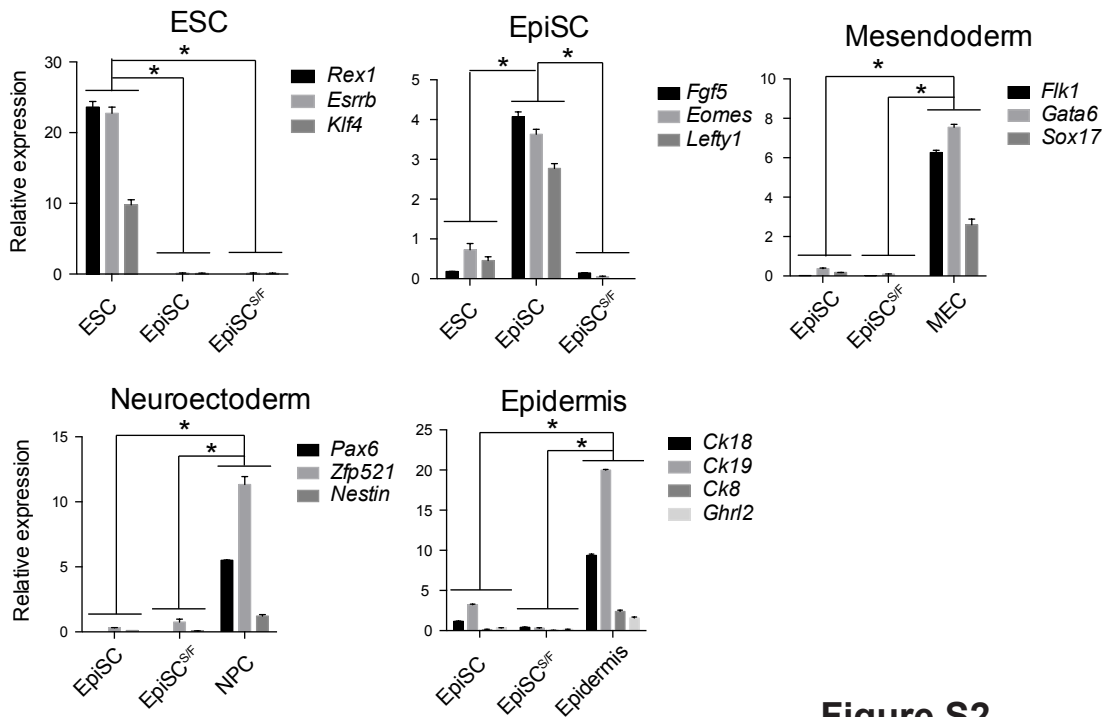**C**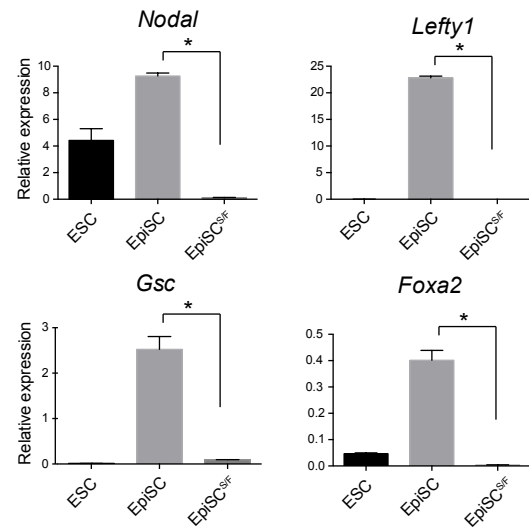**E**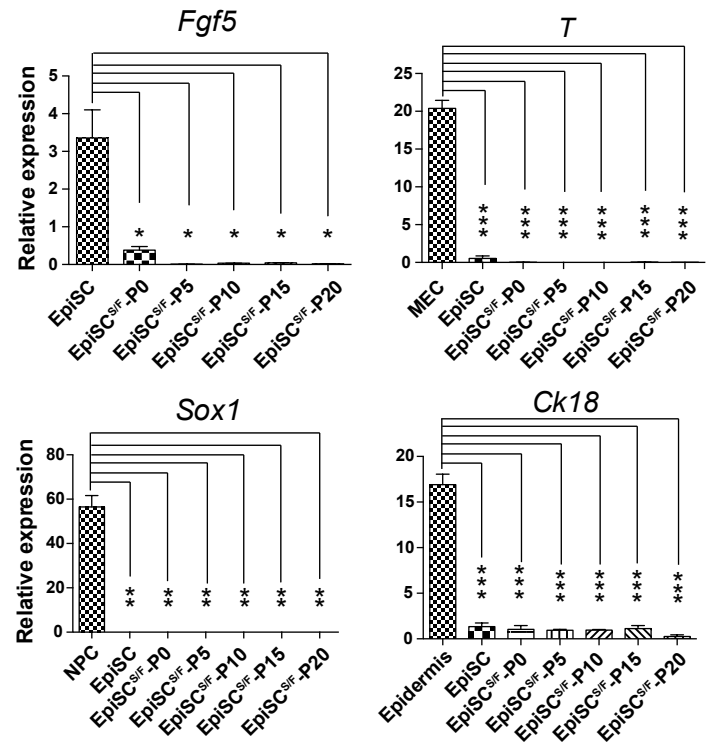**Figure S2**

**A****Cluster Dendrogram**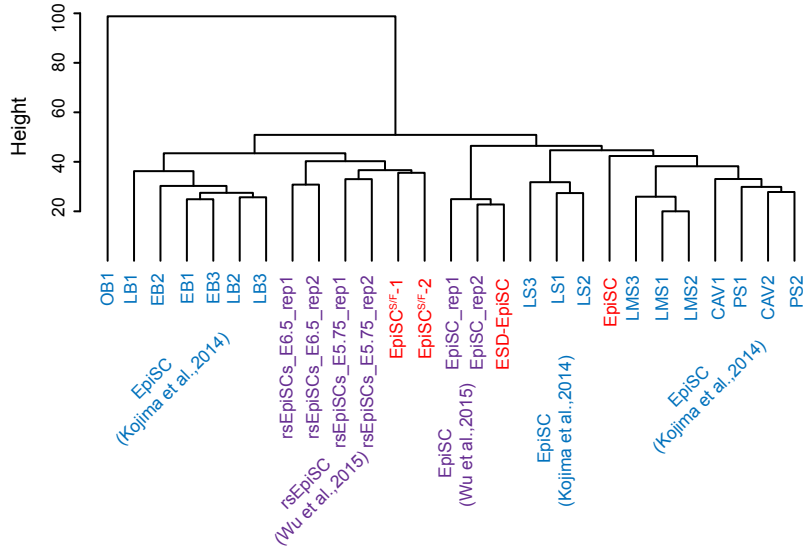**B**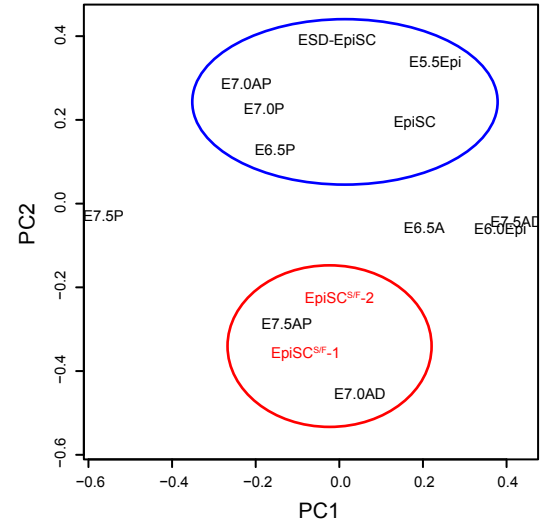**Figure S3**

**A**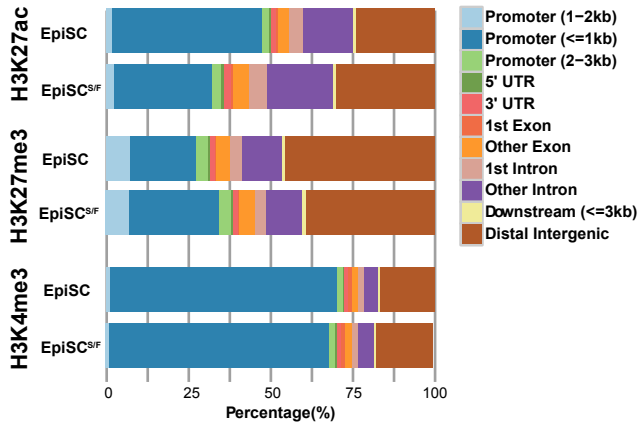**B**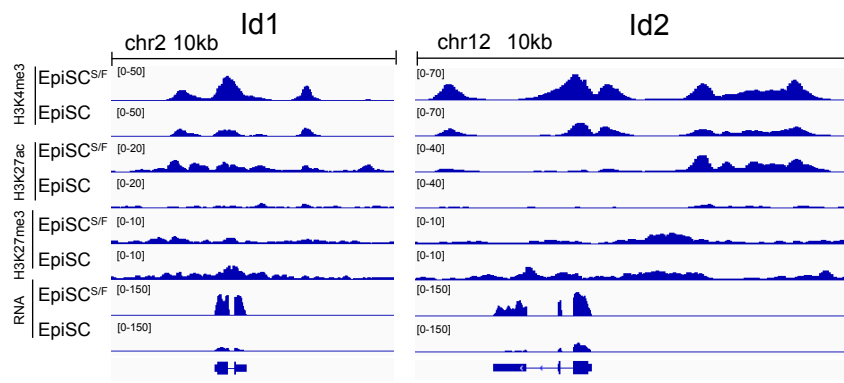**Figure S4**

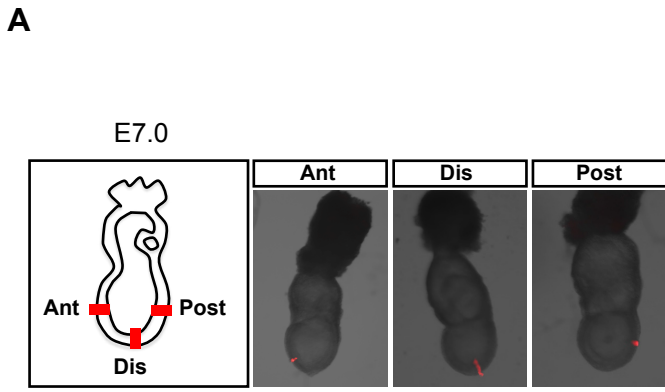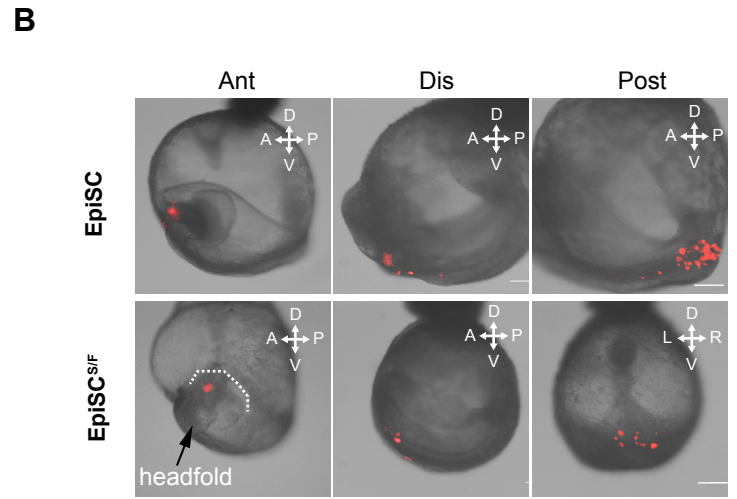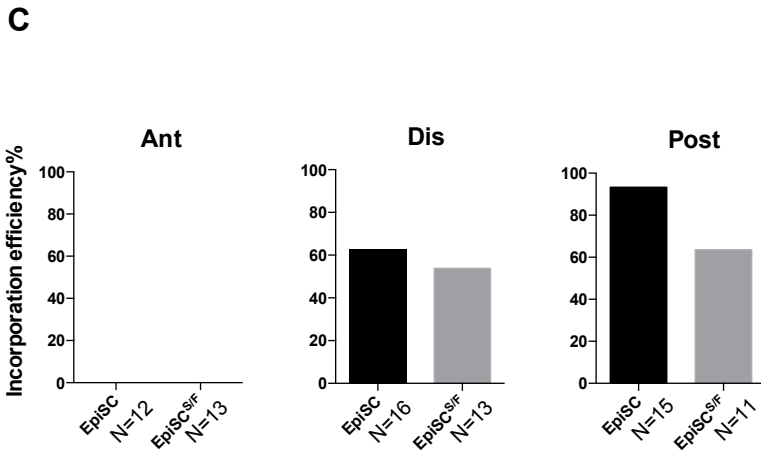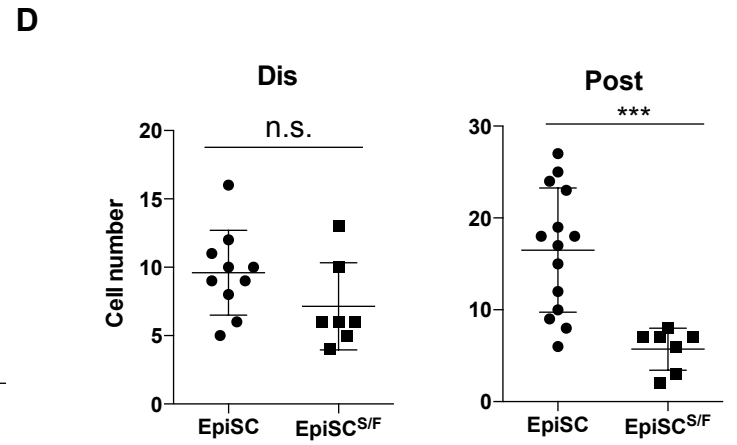

Figure S5

## Supplementary Figure Legends

### Figure S1. Derivation of EpiSC<sup>S/F</sup>, relate to Figure 1.

(A) Experimental design. EpiSC lines were derived in FGF2 and Activin A-supplemented medium. After 10 passages, EpiSC were maintained in the same medium, or with additional supplement of IWP2 for more than ten passages to generate the IW-EpiSC.

(B) PCA display of the trajectory of lineage differentiation (arrows) of EpiSC and IW-EpiSC based on gene expression profiles at Day 0-4 of differentiation (colour-coded) assessed by reporter card assay for “cell lineage” in 3 lines for each type of EpiSCs.

(C) Pie chart display of the number of up-regulated reporter card genes at Day 0 versus (VS) Day 4 of differentiation of EpiSC and IW-EpiSC. Colour identifies the pluripotency and germ layer associated genes.

(D) Experimental design. 129 EpiSC lines were derived in Activin A and bFGF-supplemented medium from E5.5 129 strain mouse embryo. After 25 passages, EpiSC were maintained in SB43 plus bFGF condition for more than ten passages to generate the EpiSC<sup>S/F</sup>.

(E) Morphology of EpiSC<sup>S/F</sup> derived from 129 EpiSC. Scale bar, 200µm.

(F) Morphology of EpiSC<sup>S/F</sup> clone derived from single EpiSC. Scale bar, 50µm.

### Figure S2. Characterization of EpiSC<sup>S/F</sup>, relate to Figure 2.

(A) Bright field images showing alkaline phosphatase expression by cytochemical staining of ESCs, EpiSCs and EpiSCs<sup>S/F</sup>. Scale bar, 500 µm.

(B) The profile of population growth of EpiSC<sup>S/F</sup> and EpiSC, data are mean ±SD.

(C) Q-PCR analysis of the expression of Nodal downstream genes: *Nodal*, *Lefty1*, *Gsc* and *Foxa2* in ESC, EpiSC and EpiSC<sup>S/F</sup>. Data are mean ±SD, n=3 for each cell type, Statistical analysis was performed using Student's t tests (\*p <0.05).

(D) Q-PCR analysis of the expression of marker genes of epiblast (*Fgf5*) in EpiSCs under SB43 plus bFGF treatment from 2 hours to 24 hours. Data are mean ±SD, n=3 for each assay. Statistical analysis was performed between control cell (first column) and cells under treatment from 2 hours to 24 hours using Student's t tests (\*p <0.05, \*\* p <0.01, \*\*\* p <0.001).

(E) Q-PCR analysis of the expression of marker genes of epiblast (*Fgf5*), mesendoderm (*T*), neuroectoderm (*Sox1*) and epidermis (*Ck18*) in EpiSCs<sup>S/F</sup>. Data are mean ±SD, n=3 for each assay at passage 0 to 20. Statistical analysis was performed between control cell (first column) and EpiSCs<sup>S/F</sup> of passage 0 to 20 using Student's t tests (\*p <0.05, \*\* p <0.01, \*\*\* p <0.001).

(F) Q-PCR analysis of expression level, relative to GAPDH, of markers of ESC (*Rex1*, *Esrrb* and *Klf4*), EpiSC (*Fgf5*, *Eomes* and *Lefty1*), mesendoderm (*Flk1*, *Gata6* and *Sox17*), neuroectoderm (*Pax6*, *Zfp521* and *Nestin*) and epidermis (*Ck18*, *Ck19*, *Ck8* and *Grhl2*) in EpiSC<sup>S/F</sup> and EpiSC, data are mean ±SD, n=3 samples each. Statistical analysis was performed using Student's t tests (\*p <0.05).

**Figure S3. Global transcriptome of EpiSCs<sup>S/F</sup>, relate to Figure 3.**

(A) Hierarchical clustering of EpiSCs (red: this study, blue: (Kojima et al., 2014), purple: rsEpiSCs (Wu et al., 2015)).

(B) PCA display of RNA-seq data of EpiSCs<sup>S/F</sup>, EpiSCs and embryonic tissue samples.

**Figure S4. Epigenetic signature of EpiSCs<sup>S/F</sup>, relate to Figure 4.**

(A) Comparison of H3K27ac, H3K27Me3 and H3K4Me3 pattern between EpiSC and EpiSC<sup>S/F</sup>. The peaks with the unique genomic feature are annotated in the color bar diagrams.

(B) The ChIP-seq signal and the expression of ectoderm-related genes (*Id1* and *Id2*). In each gene, first panel shows H3K4me3 signal, second panel shows H3K27ac signal, third panel shows H3K27me3 signal around transcription start site in EpiSC and EpiSC<sup>S/F</sup>. The last panel shows RNA expression level in EpiSC and EpiSC<sup>S/F</sup>.

**Figure S5. Differentiation of EpiSC<sup>S/F</sup> in E7.0 host chimeras, relate to Figure 5.**

(A) RFP-expressing EpiSC<sup>S/F</sup> and EpiSCs grafted to anterior (Ant), distal (Dis) and posterior (Post) regions of E7.0 embryo.

(B) Distribution of graft-derived cells in host embryo 24 hours after transplantation of RFP-expressing cells to anterior (Ant), distal (Dis) and posterior (Post) regions of E7.0 embryo. Scale bar, 200 $\mu$ m.

(C) Percentage of embryos showing incorporation of graft-derived cells transplanted to anterior (Ant), distal (Dis) and posterior (Post) regions of E7.0 embryo. N=12 embryos for EpiSC, and N=13 embryos for EpiSC<sup>S/F</sup> in anterior (Ant) grafted group. N=16 embryos for EpiSC, and N=13 embryos for EpiSC<sup>S/F</sup> in distal (Dis) grafted group. N=15 embryos for EpiSC, and N=11 embryos for EpiSC<sup>S/F</sup> in posterior (Post) grafted group.

(D) Number of EpiSC and EpiSC<sup>S/F</sup>- derived cells in the host embryo following cell transplantation to distal (Dis) and posterior (Post) regions of E7.0 embryo. Data are mean  $\pm$ SD, N=10 embryos for EpiSC, and N=7 embryos for EpiSC<sup>S/F</sup> in distal (Dis) grafted group. N=14 embryos for EpiSC, and N=7 embryos for EpiSC<sup>S/F</sup> in posterior (Post) grafted group. Statistical analysis was performed using Student's t tests (\*\*\*) p <0.001).
